# Supplementary material for: The Green Tea Polyphenol Epigallocatechin-Gallate (EGCG) Interferes with Microcin E492 Amyloid Formation
Source: MDPI journal article supplement (doi:10.3390/molecules28217262), 2023-10-25
Supplement: s1 [file s1]

## **The green tea polyphenol Epigallocatechin-Gallate (EGCG) interferes with microcin E492 amyloid formation**

Paulina Aguilera<sup>1</sup>, Camilo Berríos-Pastén<sup>1</sup>, Marcelo Veloso<sup>1</sup>, Matías Gálvez-Silva<sup>1</sup>, Florian Turbant<sup>2,3</sup>, Rosalba Lagos<sup>1</sup>, Frank Wien<sup>2</sup>, Veronique Arluison<sup>3,4,\*</sup> and Andrés E. Marcoleta<sup>1,\*</sup>

<sup>1</sup>Grupo de Microbiología Integrativa, Laboratorio de Biología Estructural y Molecular BEM, Facultad de Ciencias, Universidad de Chile. Las Palmeras 3425 Ñuñoa, Santiago, Chile.

<sup>2</sup>Synchrotron SOLEIL, L'Orme des Merisiers, Saint Aubin BP48, 91192 Gif-sur-Yvette, France.

<sup>3</sup>Laboratoire Léon Brillouin LLB, CEA, CNRS UMR12, Université Paris-Saclay, CEA Saclay, 91191 Gif-sur-Yvette, France.

<sup>4</sup>Université Paris Cité, UFR Sciences du vivant, 75006 Paris, France.

\*Correspondence: VA: [veronique.arluison@u-paris.fr](mailto:veronique.arluison@u-paris.fr), AM: [amarcoleta@uchile.cl](mailto:amarcoleta@uchile.cl)

### **SUPPLEMENTARY MATERIAL**

#### **Contents:**

**Figure S1.** Transmission electron microscopy visualization of MccE492 fibers in presence and absence of EGCG.

**Figure S2.** MccE492 secondary structure content at different temperatures in the absence or presence of EGCG determined using BestSel.

**Figure S3.** MccE492 antibacterial activity in the presence or absence of EGCG.

**Figure S4.** Acetonitrile (ACN)-gradient fractions obtained after a typical MccE492 purification.

**Table S1.** Secondary structure content of MccE492 amyloid at different temperatures in the absence of 1 mM EGCG.

**Table S2.** Secondary structure content of MccE492 amyloid at different temperatures in 1 mM EGCG.

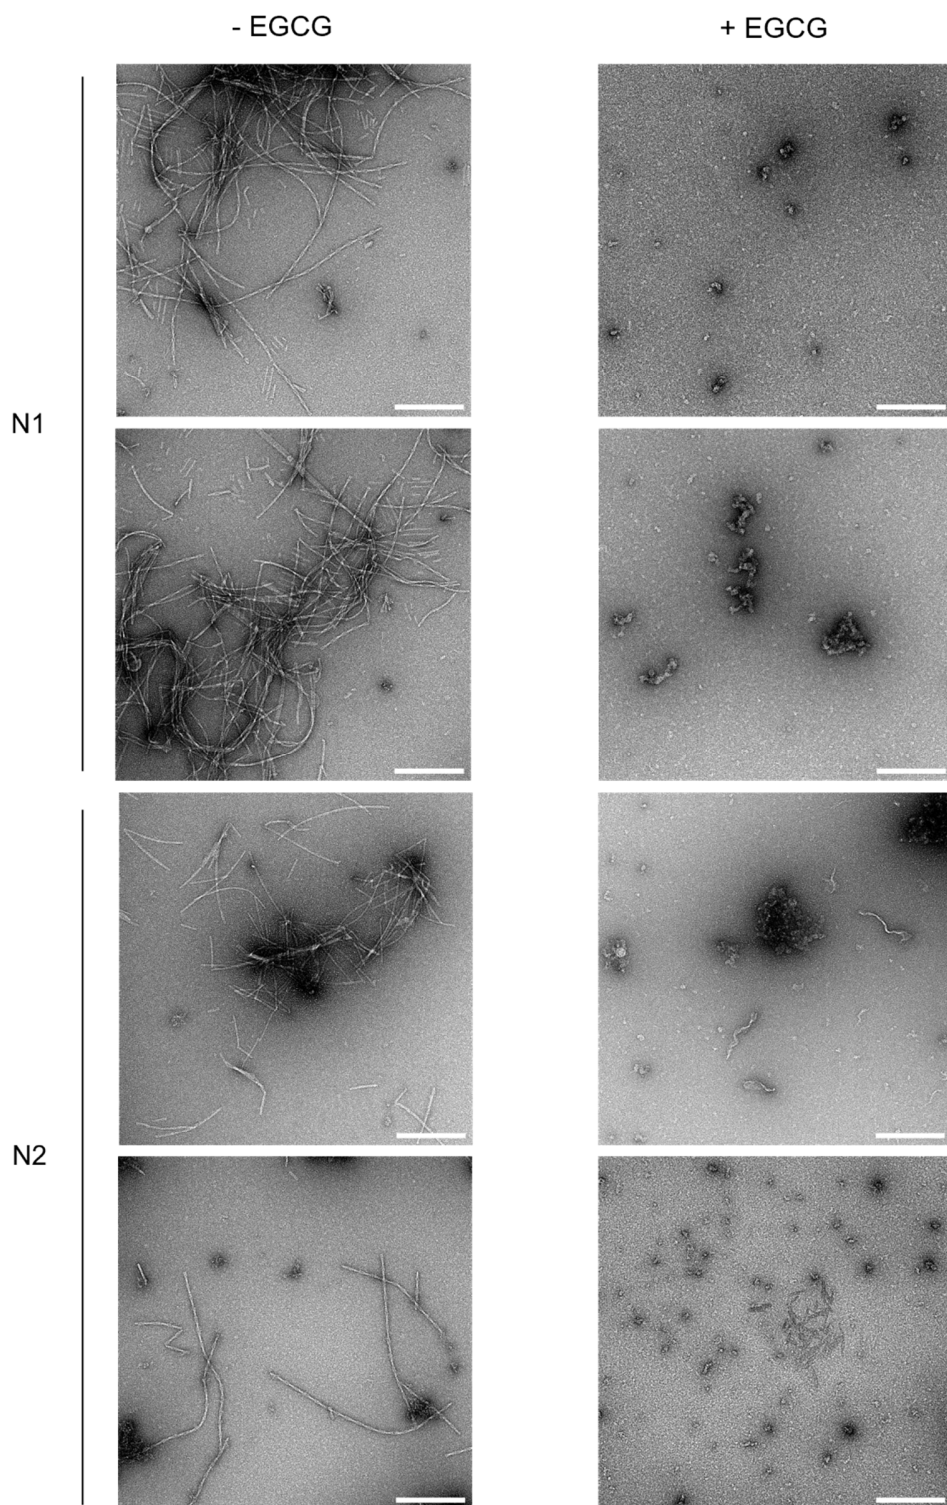

**Figure S1.** Visualization of MccE492 fibers in presence and absence of EGCG. Several fields of negative-stain electron microscopy images show the effect of EGCG in the formation of amyloid fibers after 48 h in PIPES aggregation buffer. These images correspond to two independent experiments (N1 and N2). Scale bar: 200 nm.

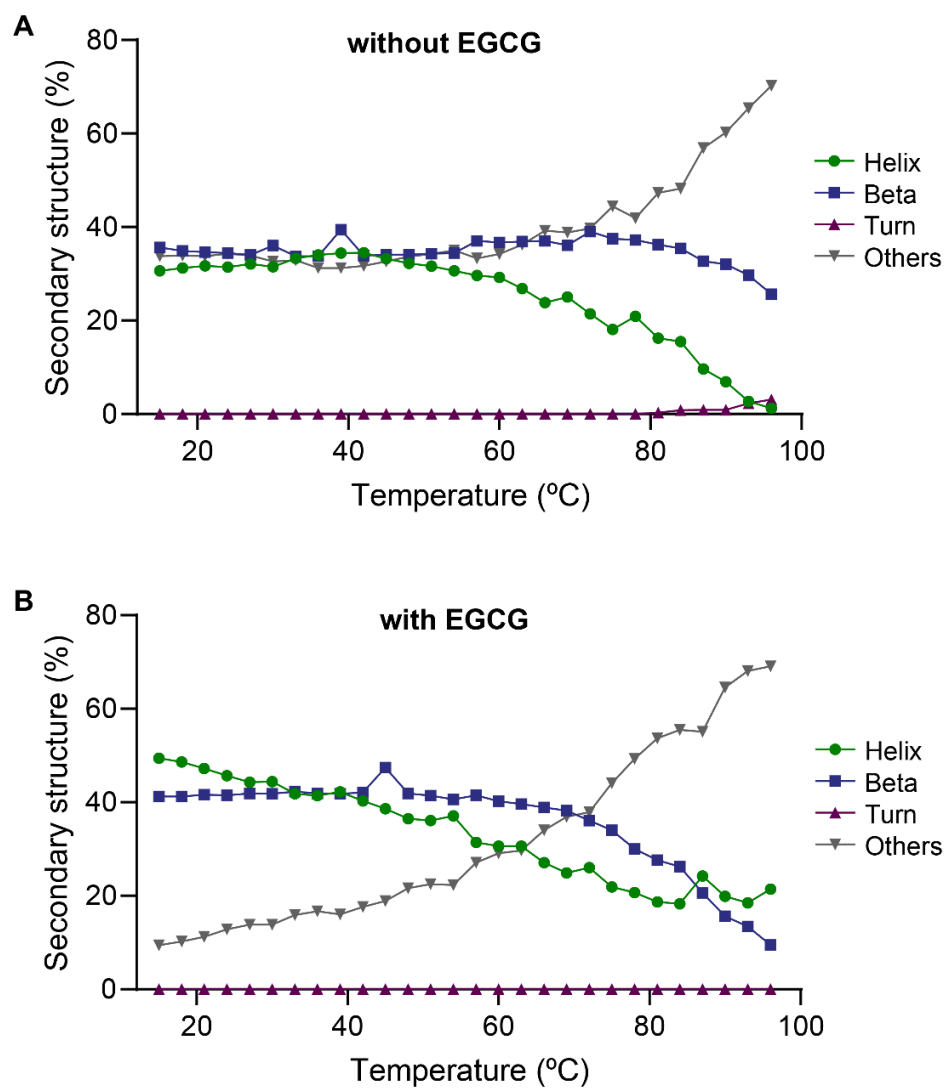

**Figure S2.** MccE492 secondary structure content at different temperatures in the absence (A) or presence (B) of EGCG determined using the BestSel software.

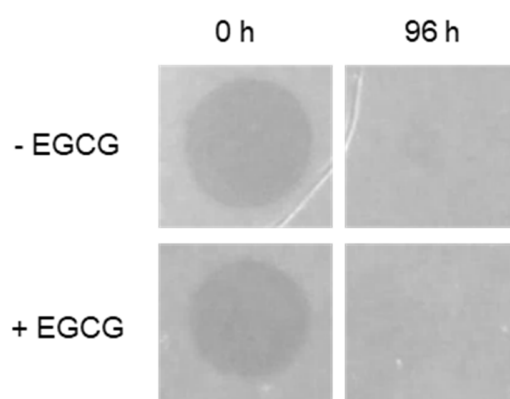

**Figure S3.** MccE492 antibacterial activity in the presence or absence of EGCG. Three  $\mu\text{L}$  of the samples from the MccE492 aggregation assays in PIPES buffer were seeded onto a lawn of sensitive *E. coli* strain. The formation of growth inhibition halos denotes MccE492 antibacterial activity.

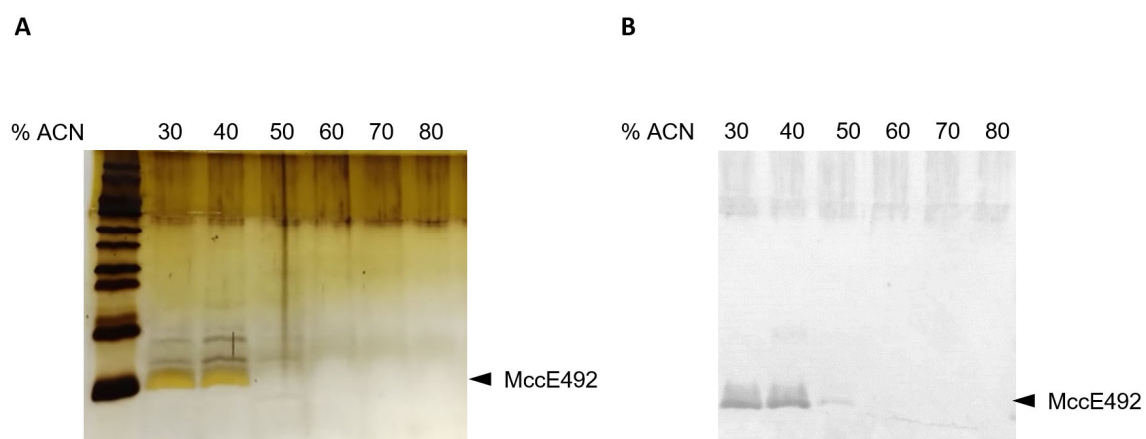

**Figure S4.** Acetonitrile (ACN)-gradient fractions obtained after a typical MccE492 purification. The ACN fractions recovered after the purifications were checked by SDS-PAGE and silver-staining **(A)**, and Western blot **(B)**.

**Table S1.** Secondary structure content of MccE492 amyloid at different temperatures in the absence of 1 mM EGCG.

| Temperature<br>(°C) | Helix  |        | $\beta$ -strand |       |       |      | Turn | Others | NRMSD   |
|---------------------|--------|--------|-----------------|-------|-------|------|------|--------|---------|
|                     | Helix1 | Helix2 | Anti1           | Anti2 | Anti3 | Para |      |        |         |
| 15                  | 19.1   | 11.5   | 0.0             | 0.0   | 0.0   | 35.6 | 0.0  | 33.8   | 0.06929 |
| 18                  | 18.8   | 12.4   | 0.0             | 0.0   | 0.0   | 34.9 | 0.0  | 33.9   | 0.07098 |
| 21                  | 19.1   | 12.6   | 0.0             | 0.0   | 0.0   | 34.6 | 0.0  | 33.8   | 0.07102 |
| 24                  | 19.1   | 12.3   | 0.0             | 0.0   | 0.0   | 34.4 | 0.0  | 34.3   | 0.07417 |
| 27                  | 19.3   | 12.8   | 0.0             | 0.0   | 0.0   | 34.0 | 0.0  | 33.9   | 0.07579 |
| 30                  | 18.4   | 13.1   | 0.0             | 0.0   | 2.2   | 33.8 | 0.0  | 32.6   | 0.07670 |
| 33                  | 19.6   | 13.7   | 0.0             | 0.0   | 0.0   | 33.8 | 0.0  | 32.9   | 0.07399 |
| 36                  | 20.0   | 14.0   | 0.0             | 0.0   | 0.0   | 33.8 | 0.0  | 32.2   | 0.07806 |
| 39                  | 20.5   | 13.9   | 0.0             | 0.0   | 2.5   | 31.9 | 0.0  | 31.2   | 0.07726 |
| 42                  | 20.6   | 13.9   | 0.0             | 0.0   | 2.0   | 31.9 | 0.0  | 31.7   | 0.07382 |
| 45                  | 19.5   | 13.7   | 0.0             | 0.0   | 0.9   | 33.2 | 0.0  | 32.6   | 0.07647 |
| 48                  | 18.3   | 13.7   | 0.0             | 0.0   | 0.4   | 33.7 | 0.0  | 33.7   | 0.07241 |
| 51                  | 18.2   | 13.4   | 0.0             | 0.0   | 1.0   | 33.3 | 0.0  | 34.2   | 0.07667 |
| 54                  | 17.3   | 13.3   | 0.0             | 0.0   | 2.4   | 32.0 | 0.0  | 35.0   | 0.07372 |
| 57                  | 16.4   | 13.2   | 0.0             | 0.0   | 4.9   | 32.1 | 0.0  | 33.3   | 0.06603 |
| 60                  | 16.0   | 13.2   | 0.0             | 0.0   | 4.5   | 32.2 | 0.0  | 34.2   | 0.06598 |
| 63                  | 14.4   | 12.4   | 0.0             | 0.0   | 1.8   | 35.1 | 0.0  | 36.2   | 0.06676 |
| 66                  | 12.4   | 11.4   | 0.0             | 0.0   | 3.4   | 33.6 | 0.0  | 39.2   | 0.06645 |
| 69                  | 12.9   | 12.1   | 0.0             | 0.0   | 2.2   | 33.9 | 0.0  | 38.8   | 0.06910 |
| 72                  | 11.7   | 9.7    | 0.0             | 0.0   | 4.2   | 34.8 | 0.0  | 39.7   | 0.06416 |
| 75                  | 9.8    | 8.3    | 0.0             | 0.0   | 3.2   | 34.3 | 0.0  | 44.4   | 0.06882 |
| 78                  | 10.5   | 10.4   | 0.0             | 0.0   | 3.7   | 33.5 | 0.0  | 41.9   | 0.06850 |
| 81                  | 7.8    | 8.4    | 0.0             | 0.0   | 2.5   | 33.7 | 0.3  | 47.3   | 0.06921 |
| 84                  | 7.1    | 8.4    | 0.0             | 0.0   | 3.1   | 32.3 | 0.8  | 48.2   | 0.07211 |
| 87                  | 3.8    | 5.8    | 0.0             | 0.0   | 0.0   | 32.7 | 0.9  | 56.9   | 0.07820 |
| 90                  | 2.3    | 4.6    | 0.0             | 0.0   | 3.4   | 28.6 | 0.9  | 60.2   | 0.08155 |
| 93                  | 0.3    | 2.4    | 0.0             | 0.0   | 1.5   | 28.2 | 2.3  | 65.4   | 0.07661 |
| 96                  | 0.0    | 1.2    | 0.0             | 0.0   | 0.0   | 25.6 | 3.1  | 70.2   | 0.09442 |

**Table S2.** Secondary structure content of MccE492 amyloid at different temperatures in the presence of 1 mM EGCG.

| Temperature<br>(°C) | Helix  |        | $\beta$ -strand |       |       |      | Turn | Others | NRMSD   |
|---------------------|--------|--------|-----------------|-------|-------|------|------|--------|---------|
|                     | Helix1 | Helix2 | Anti1           | Anti2 | Anti3 | Para |      |        |         |
| 15                  | 39.0   | 10.4   | 0.0             | 0.0   | 0.0   | 41.2 | 0.0  | 9.4    | 0.09809 |
| 18                  | 36.7   | 11.9   | 0.0             | 0.0   | 0.0   | 41.2 | 0.0  | 10.2   | 0.09928 |
| 21                  | 35.4   | 11.8   | 0.0             | 0.0   | 0.0   | 41.6 | 0.0  | 11.2   | 0.09880 |
| 24                  | 34.2   | 11.5   | 0.0             | 0.0   | 0.0   | 41.5 | 0.0  | 12.8   | 0.10016 |
| 27                  | 32.0   | 12.3   | 0.0             | 0.0   | 0.0   | 41.9 | 0.0  | 13.8   | 0.09680 |
| 30                  | 32.8   | 11.6   | 0.0             | 0.0   | 0.0   | 41.8 | 0.0  | 13.8   | 0.10406 |
| 33                  | 30.1   | 11.7   | 0.0             | 0.0   | 0.0   | 42.3 | 0.0  | 15.9   | 0.10098 |
| 36                  | 29.3   | 12.1   | 0.0             | 0.0   | 0.0   | 41.9 | 0.0  | 16.7   | 0.10351 |
| 39                  | 30.7   | 11.5   | 0.0             | 0.0   | 0.0   | 41.8 | 0.0  | 16.0   | 0.10203 |
| 42                  | 28.6   | 11.7   | 0.0             | 0.0   | 0.0   | 42.1 | 0.0  | 17.6   | 0.10003 |
| 45                  | 27.0   | 11.6   | 0.0             | 0.0   | 0.0   | 42.4 | 0.0  | 18.9   | 0.09940 |
| 48                  | 24.8   | 11.7   | 0.0             | 0.0   | 0.0   | 41.9 | 0.0  | 21.6   | 0.09985 |
| 51                  | 24.7   | 11.4   | 0.0             | 0.0   | 0.0   | 41.4 | 0.0  | 22.5   | 0.09649 |
| 54                  | 26.3   | 10.8   | 0.0             | 0.0   | 0.0   | 40.6 | 0.0  | 22.3   | 0.09696 |
| 57                  | 21.4   | 10.0   | 0.0             | 0.0   | 0.0   | 41.5 | 0.0  | 27.1   | 0.09747 |
| 60                  | 21.0   | 9.6    | 0.0             | 0.0   | 0.0   | 40.2 | 0.0  | 29.1   | 0.09845 |
| 63                  | 21.7   | 8.9    | 0.0             | 0.0   | 0.0   | 39.6 | 0.0  | 29.7   | 0.09542 |
| 66                  | 20.1   | 7.0    | 0.0             | 0.0   | 0.0   | 38.9 | 0.0  | 34.0   | 0.10341 |
| 69                  | 19.0   | 5.9    | 0.0             | 0.0   | 0.0   | 38.2 | 0.0  | 36.9   | 0.10988 |
| 72                  | 21.5   | 4.5    | 0.0             | 0.0   | 0.0   | 36.1 | 0.0  | 37.9   | 0.10791 |
| 75                  | 18.4   | 3.5    | 0.0             | 0.0   | 0.0   | 34.0 | 0.0  | 44.1   | 0.11015 |
| 78                  | 19.7   | 1.0    | 0.0             | 0.0   | 0.0   | 30.0 | 0.0  | 49.3   | 0.11028 |
| 81                  | 18.7   | 0.0    | 0.0             | 0.0   | 0.0   | 27.6 | 0.0  | 53.7   | 0.11804 |
| 84                  | 18.3   | 0.0    | 0.0             | 0.0   | 0.0   | 26.2 | 0.0  | 55.5   | 0.12599 |
| 87                  | 24.2   | 0.0    | 0.0             | 0.0   | 0.0   | 20.6 | 0.0  | 55.1   | 0.11457 |
| 90                  | 19.9   | 0.0    | 0.0             | 0.0   | 0.0   | 15.6 | 0.0  | 64.6   | 0.12205 |
| 93                  | 18.5   | 0.0    | 0.0             | 0.0   | 0.0   | 13.4 | 0.0  | 68.1   | 0.12198 |
| 96                  | 21.4   | 0.0    | 0.0             | 0.0   | 0.0   | 9.5  | 0.0  | 69.1   | 0.12917 |
